# Supplementary material for: Effects of cranberry beverages on oxidative stress and gut microbiota in subjects with Helicobacter pylori infection: a randomized, double-blind, placebo-controlled trial
Source: Royal Society of Chemistry journal article supplement (doi:10.1039/d1fo00467k), 2021-01-01
Supplement: d1fo00467k1.pdf [file d1fo00467k1.pdf]

## Online supplemental data

**Table S1.** Composition of the intervention beverage

| <b>Components*</b>                     | <b>Cranberry beverage</b> | <b>Placebo beverage</b> |
|----------------------------------------|---------------------------|-------------------------|
| Energy,kcal                            | 35                        | 35                      |
| Carbohydrates,g                        | 9                         | 9                       |
| —Sugars,g                              | 6                         | 7                       |
| Protein,g                              | 0                         | 0                       |
| Total fat,g                            | 0                         | 0                       |
| Sodium,mg                              | 50                        | 45                      |
| Total Anthocyanins <sup>b</sup> , mg   | 2.23± 0.66                | N/D <sup>a</sup>        |
| Proanthocyanidins <sup>c</sup> , mg    | 42.56± 2.06               | N/D                     |
| Total phenolics <sup>d</sup> , mg      | 157.55± 5.08              | N/D                     |
| Total phenolic acids <sup>b</sup> , mg | 12.09± 1.5                | N/D                     |
| Total flavonols <sup>b</sup> , mg      | 6.86± 0.92                | N/D                     |
| Total organic acids <sup>b</sup> , mg  | 1925±73                   | 1748± 44                |

\* Non-polyphenol mandatory label information (energy, carbohydrate, sugar, protein, fat, sodium) were tested only at the time of production. Allowable variation range was +/- 20% as defined in National Food Safety Standard GB 28050 Nutrition Labeling of Prepackaged Foods. Polyphenols and organic acids were measured at the time of production and every 3 months thereafter (mean ± SD; N = 9). Values are expressed based on one serving of 240mL.

<sup>a</sup>N/D: not detectable.

<sup>b</sup>Measured by HPLC method.

<sup>c</sup>Measured by BL-DMAC method.

<sup>d</sup>Measured by Folin-Ciocalteu method.

**Table S2.** Alpha diversity indices of the three groups at baseline and after intervention

| Group               | Time      | OTU            | ACE            | Chao1          | Simpson | Shannon |
|---------------------|-----------|----------------|----------------|----------------|---------|---------|
| High-dose<br>(n=43) | Day 0     | 216.7±46.<br>7 | 251.3±47.<br>5 | 257.4±54.<br>6 | 0.1±0.1 | 3.1±0.5 |
|                     | Day<br>28 | 209.3±44.<br>2 | 245.4±44.<br>1 | 244.4±46.<br>5 | 0.1±0.1 | 3.1±0.4 |
| Low-dose<br>(n=51)  | Day 0     | 220±38.3       | 251.7±41.<br>2 | 254.0±40.<br>3 | 0.1±0.1 | 3.1±0.5 |
|                     | Day<br>28 | 212.0±36.<br>5 | 251.2±37.<br>2 | 254.1±41.<br>7 | 0.1±0.1 | 3.1±0.4 |
| Placebo<br>(n=38)   | Day 0     | 210.1±47.<br>8 | 247.1±42.<br>5 | 250.6±54.<br>1 | 0.1±0.1 | 3.1±0.5 |
|                     | Day<br>28 | 203.8±47.<br>9 | 240.6±45.<br>3 | 238.1±50.<br>6 | 0.1±0.1 | 3.0±0.5 |

A OTU level

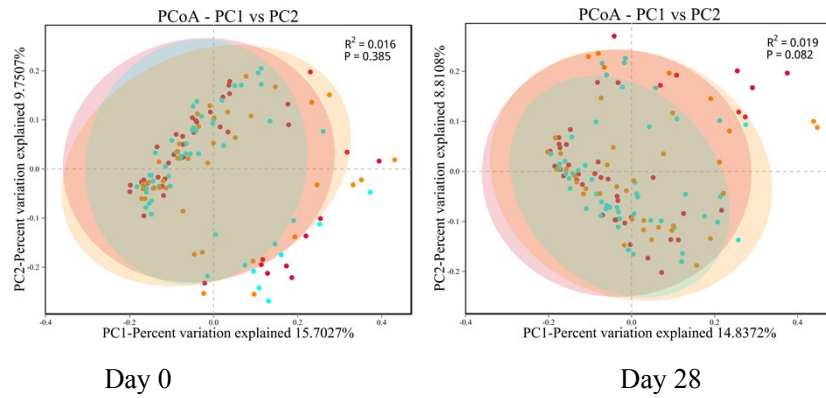

B Phylum level

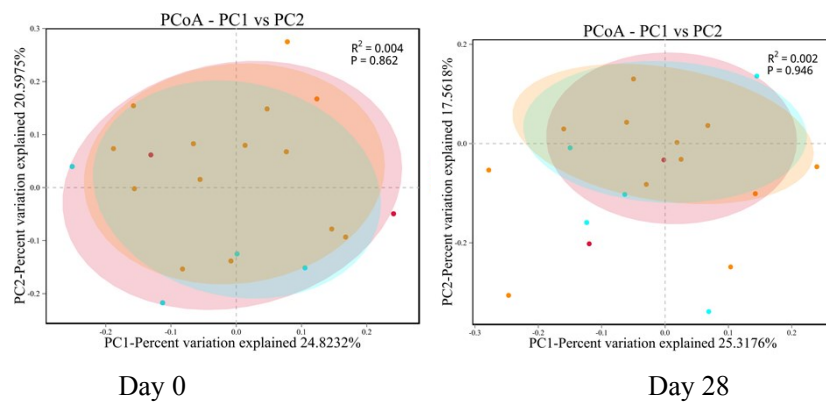

C Genus level

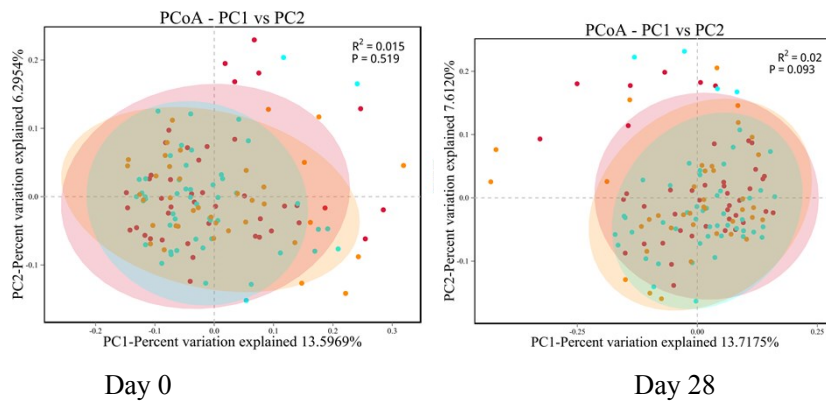

**Figure S1** PCoA score plots based on Binary-jaccard distance at baseline and Day 28 among the three groups at the OTU (A), phylum (B) and genus (C) level. PCoA, principal coordinate analysis; OTU, operational taxonomic unit. Red: High-dose group; blue: low-dose group; yellow: placebo group. High-dose: n=43, low-dose: n=51, placebo: n=38.
